# Supplementary material
Source: PubMed Central journal article supplement (PMC6825582)
Supplement: NIHMS1538519-supplement-1.pdf [file NIHMS1538519-supplement-1.pdf]

Supplementary Figure S1

A

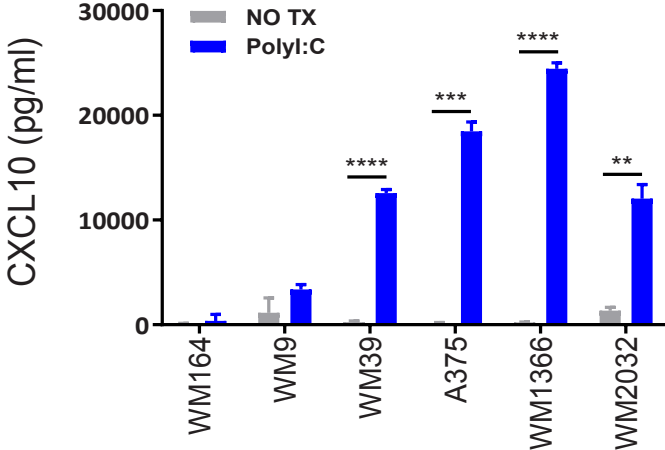

B

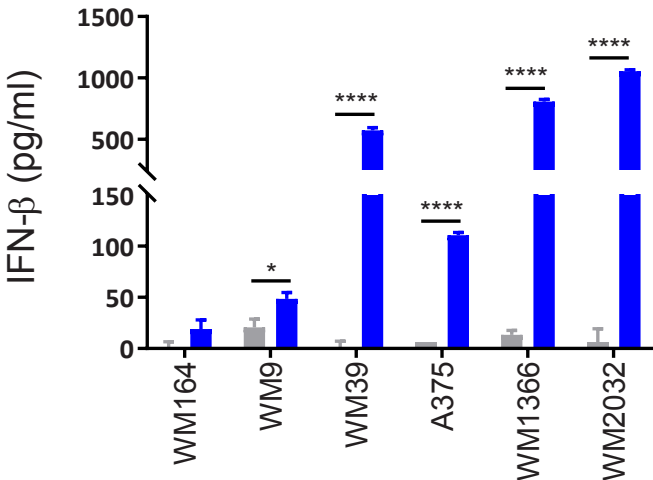

**Supplementary Fig. S1. STING-independent induction of CXCL10 and IFN- $\beta$  in a series of human melanoma cell lines in response to stimulation with polyI:C.** Human melanoma cell lines were stimulated with polyI:C for 24 h. **(A)** CXCL10 and **(B)** IFN- $\beta$  levels in cell culture supernatants were measured using ELISA and reported as mean  $\pm$  SD of three biological replicates. Statistical significance was determined by unpaired t-test (\*P < 0.05, \*\*P < 0.01, \*\*\*P < 0.001, \*\*\*\*P < 0.0001).

Supplementary Figure S2

**A**

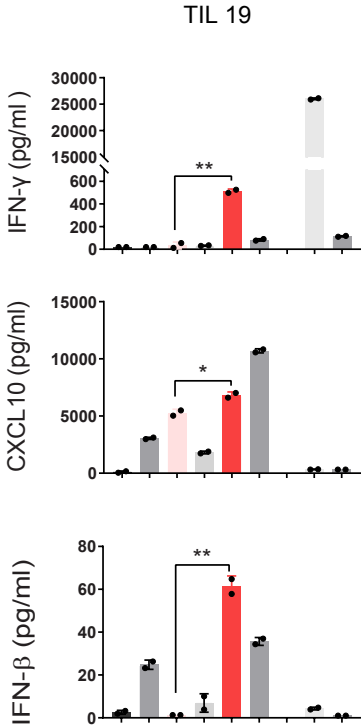

|               |   |   |   |   |   |   |   |
|---------------|---|---|---|---|---|---|---|
| WM39 + MART-1 | + | + | + | + | + | - | - |
| TIL 19        | - | - | + | + | + | + | + |
| 2'3'-cGAMP    | - | + | - | - | + | + | - |
| w6/32         | - | - | - | + | - | + | - |
| α-CD3         | - | - | - | - | - | - | + |

**B**

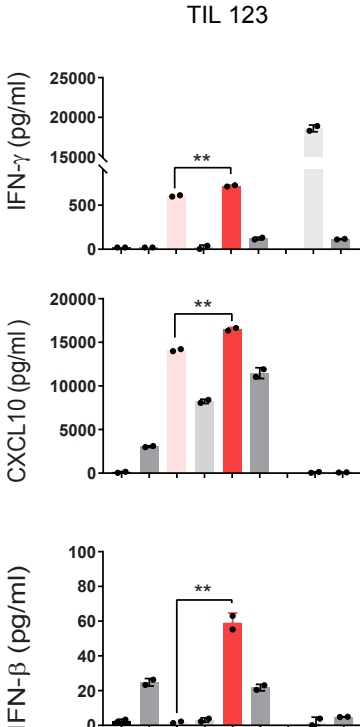

|               |   |   |   |   |   |   |   |
|---------------|---|---|---|---|---|---|---|
| WM39 + MART-1 | + | + | + | + | + | - | - |
| TIL 123       | - | - | + | + | + | + | + |
| 2'3'-cGAMP    | - | + | - | - | + | + | - |
| w6/32         | - | - | - | + | - | + | - |
| α-CD3         | - | - | - | - | - | - | + |

**Supplementary Fig. S2. Activation of STING signaling results in enhanced immunogenicity of MART-1 pulsed WM39 melanoma cells.** (A) TIL 19 and (B) TIL 123 (both HLA-A2) were co-cultured with MART-1 pulsed WM39 cells for 24 h with or without 2'3'-cGAMP. IFN- $\gamma$  (top), CXCL10 (middle) and IFN- $\beta$  (bottom) levels in co-culture supernatants were measured using ELISA and reported as mean  $\pm$  SD and statistical significance was determined by the student's t-test. \*,  $p < 0.05$ , \*\*,  $p < 0.01$ .

# Supplementary Figure S3

**A**

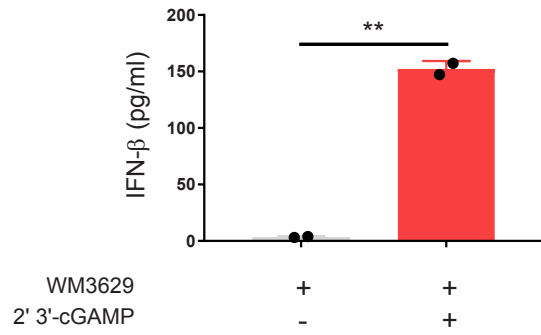

**B**

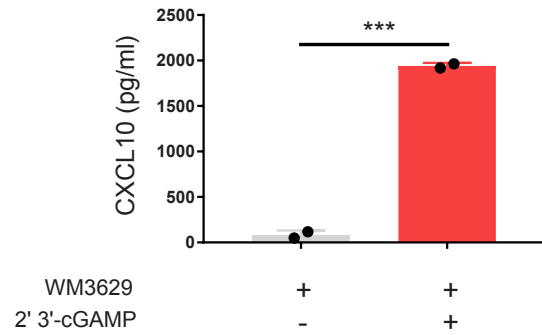

**C**

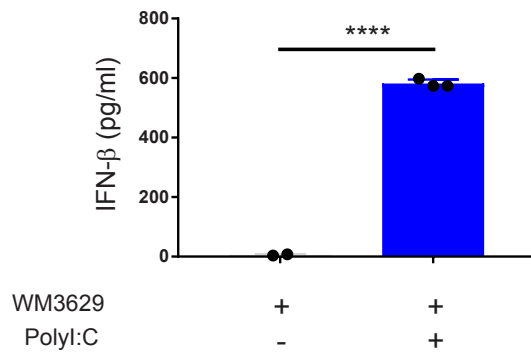

**D**

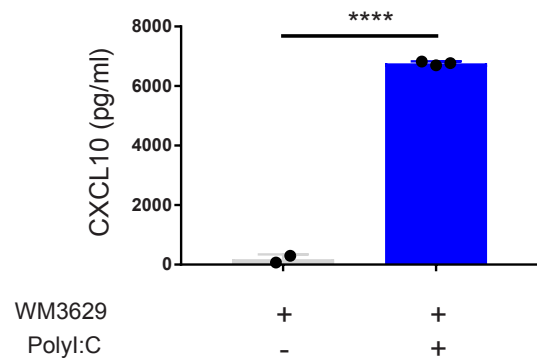

**Supplementary Fig. S3. STING-dependent and STING-independent induction of CXCL10 and IFN- $\beta$  in WM3629 cell line.** (A, B) WM3629 cells were stimulated with and without 2'3'-cGAMP for 24 h. CXCL10 and IFN- $\beta$  levels in cell culture supernatants were measured using ELISA. (C, D) WM3629 cells were stimulated with and without polyI:C for 24 h. CXCL10 and IFN- $\beta$  levels in cell culture supernatants were measured using ELISA. Data represent mean  $\pm$  SD of 2-3 biological replicates.

Supplementary Figure S4

**A**

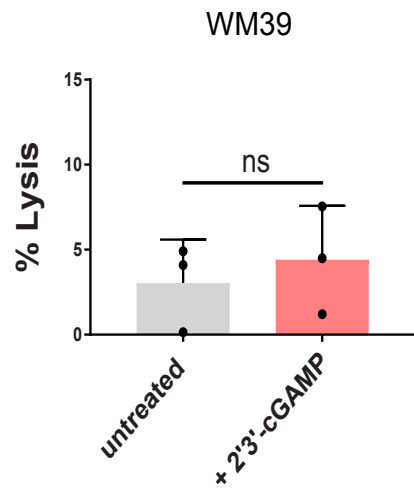

**B**

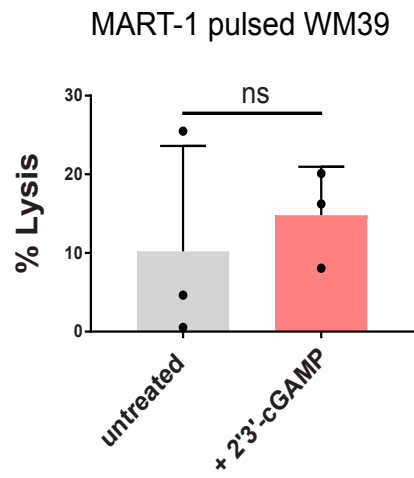

**C**

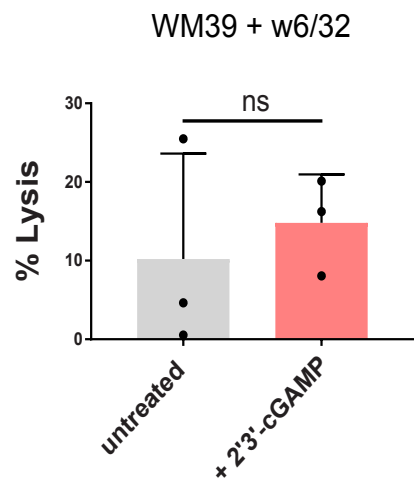

**Supplementary Fig. S4. Stimulation with the STING agonist alone does not result in any major cytotoxic effect on melanoma cells.** Lysis percentage of (A) WM39, (B) MART-1 pulsed WM39 and (C) WM39+w6/32 target cells in the <sup>51</sup>Cr release cytotoxicity assay incubated with or without 2'3'-cGAMP in the absence of TIL. Data represent the mean  $\pm$  SD of 3-4 biological replicates. Statistical significance was determined by the student's t-test. \*,  $p < 0.05$ .



Supplementary Figure S5

**A**

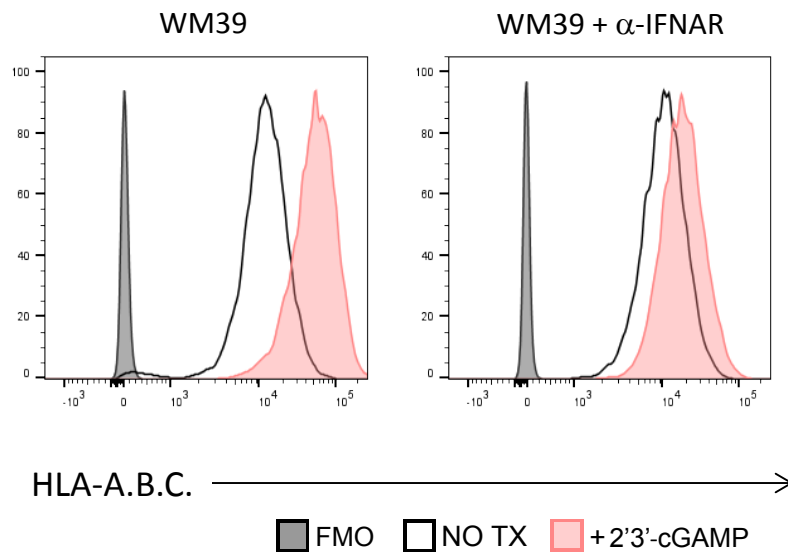

**B**

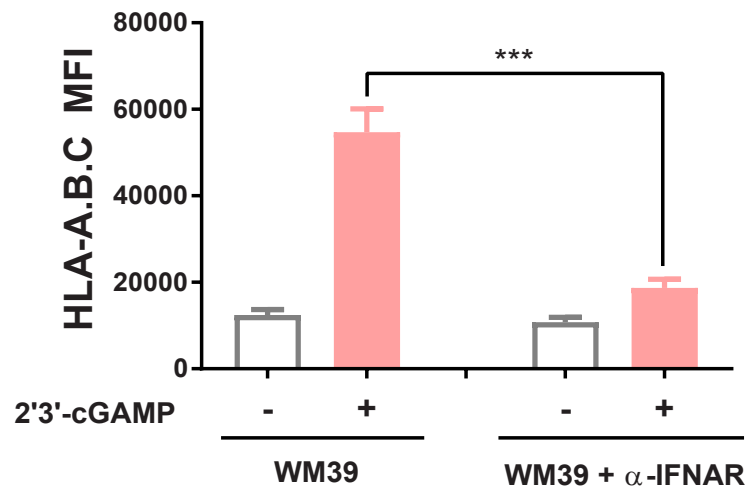

**Supplementary Fig. S5. Blockade of IFNAR inhibits agonist-induced upregulation of MHC class I (HLA-A.B.C.).** (A) Representative histograms of HLA-A.B.C expression on WM39 cells stimulated with 2'3'-cGAMP in the presence or absence of  $\alpha$ -IFNAR. (B) Mean fluorescence intensity (MFI) of HLA-A.B.C on indicated cells. Data are mean  $\pm$  SD of three biological replicates. Statistical significance was determined by unpaired t-test (\*\*\*,  $p < 0.001$ ).

# Supplementary Figure S6

## A

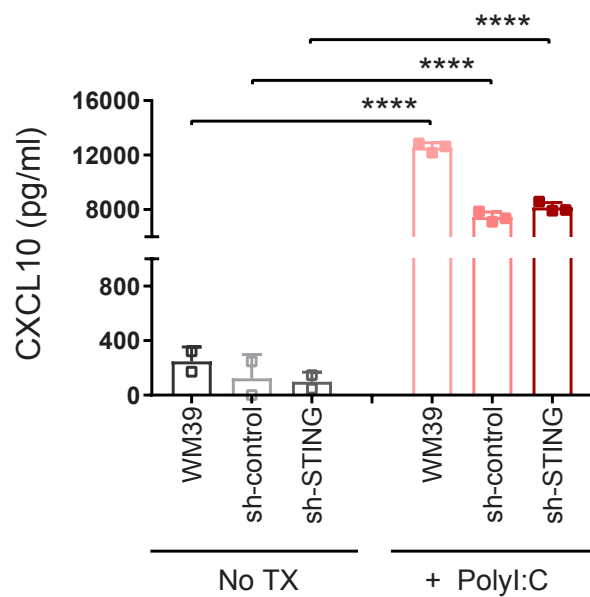

## B

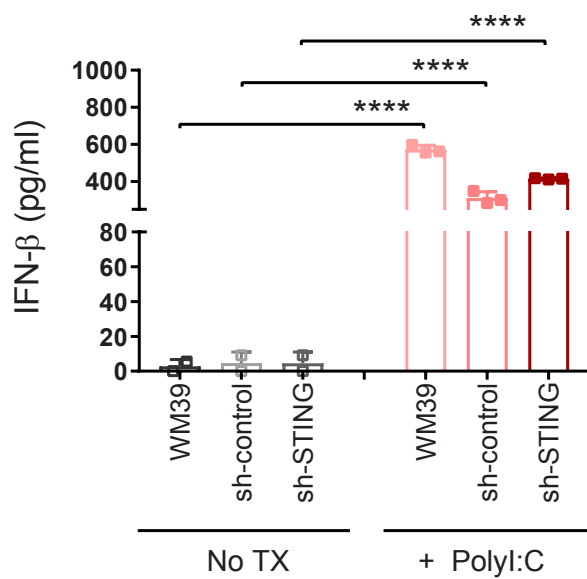

**Supplementary Fig. S6. Knockdown of STING in melanoma cells does affect induction of CXCL10 and IFN- $\beta$  in response to stimulation with polyI:C.** WM39, sh-control and sh-STING cells were stimulated with polyI:C for 24 h. **(A)** CXCL10 and **(B)** IFN- $\beta$  levels in cell culture supernatants were measured using ELISA. Data are presented as mean  $\pm$  SD of three biological replicates. P-values were calculated by one-way ANOVA (\*\*P < 0.01, \*\*\*P < 0.001, \*\*\*\*P < 0.0001).
